# Supplementary material
Source: MDPI journal article supplement (https://www.mdpi.com/2073-445X/8/3/47)
Supplement: s1 [file s1]

**Table S1.** Summary of the results of the comparison between the components of the FBCs with the local urban form-related regulations and guidelines for new urban neighborhoods in Abu Dhabi.

**Legend:**

S: Standards

G: Guidelines

ADM: Abu Dhabi Municipality

ADUPC: Abu Dhabi Urban Planning Council

DoT: Department of Transportation

|                                                                                   |                             |
|-----------------------------------------------------------------------------------|-----------------------------|
| 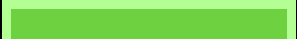 | Existing component          |
| 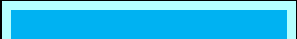 | Partially missing component |
| 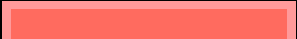 | Missing component           |

| FBC components          |                                |                                 | Form-related standards and guidelines in Abu Dhabi |                |                  |
|-------------------------|--------------------------------|---------------------------------|----------------------------------------------------|----------------|------------------|
|                         |                                |                                 | Regulation item                                    | Source         | Legislation type |
| Regulating plan         | Administrative role (land use) | Direct role (street frontage)   | Submission requirements- master plan               | ADUPC-2 (2013) | S                |
|                         |                                |                                 |                                                    |                |                  |
|                         | Planning role                  |                                 | Submission requirements- master plan               | ADUPC-2 (2013) | S                |
|                         |                                |                                 |                                                    |                |                  |
| Public spaces standards | Thoroughfare                   | Movement type                   | Street typology                                    | ADUPC-1 (2012) | S                |
|                         |                                | Design speed                    | Vehicles speed                                     | ADUPC-1 (2012) | S                |
|                         |                                | Pedestrian crossing time        | Pedestrian crossing time                           | ADUPC-1 (2012) | S                |
|                         |                                | Traffic lanes                   | Transport capacity                                 | ADUPC-1 (2012) | S                |
|                         |                                | Bicycle lanes                   | Cycle track                                        | ADUPC-1 (2012) | G                |
|                         |                                | Planter type                    | Plant selection                                    | ADUPC-1 (2012) |                  |
|                         |                                | Distances between intersections | Junction design: spacing and layout                | ADUPC-1 (2012) | S                |
|                         |                                | Right-of-Way (R.O.W.) width     | Right-of-Way (R.O.W.) width                        | ADUPC-1 (2012) | S                |
|                         |                                | Curb face to curb face width    | Traveled way                                       | ADUPC-1 (2012) | S                |

|                          |                            |                                            |                                        |                                  |                |
|--------------------------|----------------------------|--------------------------------------------|----------------------------------------|----------------------------------|----------------|
|                          |                            | Parking lanes                              | Parking                                | ADUPC-1 (2012)DoT (2014)         | G              |
|                          |                            | Curb type                                  | Curb design                            | ADUPC-1 (2012)                   | S              |
|                          |                            | Landscape Type                             | Landscaping and water use              | ADUPC-1 (2012)<br>ADUPC-1 (2010) | S              |
|                          |                            | Walkway Type                               | Pedestrian realm (through lane)        | ADUPC-1 (2012)                   | S              |
|                          |                            | Lighting                                   | Lighting standards                     | DoT-2 (2013) ADUPC-1 (2012)      | S              |
|                          |                            | Curb radius                                | Corner radii                           | ADUPC-1 (2012)                   | S              |
|                          |                            | Civic spaces                               | General character                      | Characteristics                  | ADUPC-1 (2010) |
|                          | Activity type              |                                            | Features/Activities                    | ADUPC-1 (2010)                   | S              |
|                          | Acreage                    |                                            | Level of service                       | ADUPC-1 (2010)                   | S              |
|                          | Location                   |                                            | Location                               | ADUPC-1 (2010)                   | S              |
|                          | Size                       |                                            | Universal standard for open space      | ADUPC-1 (2010)                   | S              |
| Block standards          |                            | Maximum block size                         | 240 m                                  | ADUPC-1 (2014)                   | S              |
| Building types standards | General description        | Description                                | ADM (2014)                             |                                  |                |
|                          |                            | Facility type                              | ADUPC-1 (2014)                         | S                                |                |
|                          |                            | Lot size                                   | ADM (2014)                             |                                  |                |
|                          | Required lot size          | Minimum site size for community facilities | ADUPC-1 (2014)                         | S                                |                |
|                          |                            | Mosque                                     | ADUPC (2013)<br>ADUPC-1 (2013)         | S                                |                |
|                          |                            | Pedestrian access                          | Pedestrian access to the plot          | ADM (2014)                       | S              |
|                          | Frontages                  |                                            |                                        |                                  |                |
|                          | Vehicle access and parking | Vehicle access and parking                 | ADM (2014) ADUPC (2013)                | S                                |                |
|                          |                            | Service                                    | Service                                | ADUPC-2 (2014)                   | S              |
|                          | Open space                 | Open space                                 | ADM (2014) ADUPC (2013) ADUPC-1 (2014) | S                                |                |
|                          | Landscape                  | Landscape                                  | ADM (2014)                             | S                                |                |

|                         |                     |                                       |                                     |                                  |   |
|-------------------------|---------------------|---------------------------------------|-------------------------------------|----------------------------------|---|
|                         |                     | Building size and massing             |                                     |                                  |   |
| Building Form Standards | Building placement  | Built-to line                         | Ancillary building for villas       | ADM (2014)                       | S |
|                         |                     | Setback                               | Minimum building setbacks           | ADM (2014)                       | S |
|                         |                     | Maximum lot width                     | Maximum lot width                   | ADM (2014)                       | S |
|                         |                     | Minimum lot width                     | Minimum lot width                   | ADM (2014)                       | S |
|                         | Building form       | Minimum building height               | Minimum building height             | ADM (2014)                       | S |
|                         |                     | Maximum building height               | Maximum building height             | ADM (2014)                       | S |
|                         |                     | Ground-floor finished level height    | Maximum ground floor finished level | ADM (2014)                       | S |
|                         |                     | Minimum ground-floor ceiling height   | Minimum ground floor height         | ADM (2014)                       | S |
|                         |                     | Minimum upper-floor(s) ceiling height | Minimum first floor height          | ADM (2014)                       | S |
|                         |                     | Maximum building depth                | The maximum plot coverage           | ADM (2014)                       | S |
|                         |                     | Maximum ancillary building size       | Majlis                              | ADM (2014)                       | S |
|                         |                     |                                       | Building facilities                 | ADUPC-1 (2014)                   | S |
|                         |                     | Signage                               | Signage regulations                 | ADUPC-2 (2012)                   | S |
|                         | Land uses           | Allowed land uses                     | Land uses                           | ADM (2014)                       | S |
|                         | Parking regulations | Required spaces and location          | Parking regulation                  | ADM (2014) DoT (2009) DoT (2014) | S |
| Frontage type standards |                     | Minimum depth, Height and Width       |                                     | ADM (2014)                       | S |
| Architectural standards |                     | Massing                               | Barjeel                             | ADM (2014)                       | G |
|                         |                     | Façade combination                    | Location of entrances               |                                  | S |
|                         |                     | Windows and doors                     | Location of windows                 | ADUPC-5 (2010)                   | S |
|                         |                     | Elements and details                  | The use of <i>mashrabiya</i>        | ADUPC-4 (2010)                   | G |
|                         |                     | Materials                             | Color of exterior wall finish       | ADUPC-5 (2010)                   | S |
